# Supplementary material for: A systematic molecular dynamics approach to the study of peptide Keap1–Nrf2 protein–protein interaction inhibitors and its application to p62 peptides
Source: Royal Society of Chemistry journal article supplement (doi:10.1039/c6mb00030d), 2016-02-25

## Supporting Information

# A Systematic Molecular Dynamics Approach to the Study of Peptide Keap1-Nrf2 Protein-Protein Interaction Inhibitors and Its Application to p62 Peptide

Meng-Chen Lu,<sup>a,b</sup> Zhen-Wei Yuan,<sup>a,b</sup> Yong-Lin Jiang,<sup>a,b</sup> Zhi-Yun Chen,<sup>a,b</sup> Qi-Dong You<sup>a,b,c\*</sup> and  
Zheng-Yu Jiang<sup>a,b,c\*</sup>.

<sup>a</sup>State Key Laboratory of Natural Medicines, China Pharmaceutical University, Nanjing 210009, China;

<sup>b</sup>Jiangsu Key Laboratory of Drug Design and Optimization, China Pharmaceutical University, Nanjing;  
210009, China

<sup>c</sup>Department of Medicinal Chemistry, School of Pharmacy, China Pharmaceutical University, Nanjing  
210009, China.

## Contents

1. The time-dependence of the RMSD of the backbone atoms;
2. Detailed results of Keap1-peptides binding energy calculation using different GB models;
3. The binding energy decomposition results of Keap1-p62 peptide;
4. The detailed procedures for the peptide synthesis

# 1. The time-dependence of the RMSD of the backbone atoms;

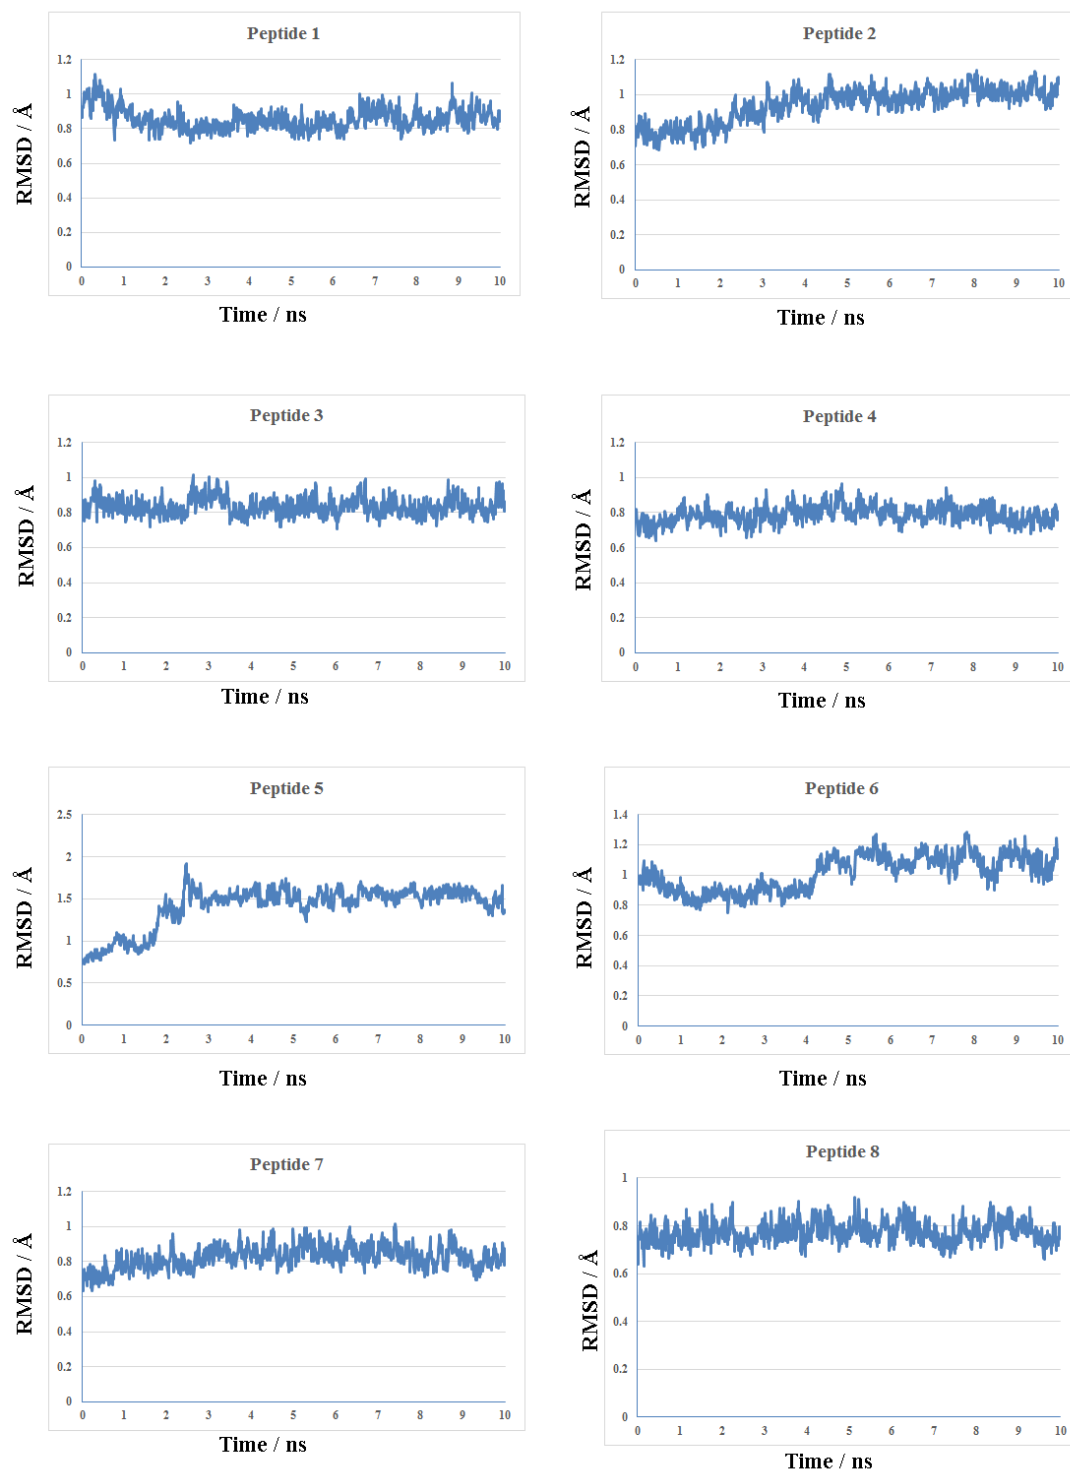

Figure S1. Stability examination for MD simulations. Time series of RMSD values of Keap1-peptide complexes are shown with respect to structures obtained at the end of the equilibration procedure

Detailed results of Keap1-peptides binding energy calculation using different GB models

**Peptide 1 igb-1**

GENERALIZED BORN:

Complex:

| Energy Component | Average     | Std. Dev. | Std. Err. of Mean |
|------------------|-------------|-----------|-------------------|
| VDWAALS          | -2387.6512  | 19.1768   | 1.9177            |
| EEL              | -19412.2893 | 68.1303   | 6.8130            |
| EGB              | -3885.4421  | 49.6604   | 4.9660            |
| ESURF            | 87.8151     | 1.4902    | 0.1490            |
| G gas            | -21799.9405 | 68.8024   | 6.8802            |
| G solv           | -3797.6269  | 48.9660   | 4.8966            |
| TOTAL            | -25597.5674 | 47.6222   | 4.7622            |

Receptor:

| Energy Component | Average     | Std. Dev. | Std. Err. of Mean |
|------------------|-------------|-----------|-------------------|
| VDWAALS          | -2300.2622  | 19.2031   | 1.9203            |
| EEL              | -18876.5771 | 63.8142   | 6.3814            |
| EGB              | -3300.4302  | 45.0667   | 4.5067            |
| ESURF            | 87.5260     | 1.4371    | 0.1437            |
| G gas            | -21176.8392 | 63.5484   | 6.3548            |
| G solv           | -3212.9042  | 44.4036   | 4.4404            |
| TOTAL            | -24389.7434 | 48.0280   | 4.8028            |

Ligand:

| Energy Component | Average    | Std. Dev. | Std. Err. of Mean |
|------------------|------------|-----------|-------------------|
| VDWAALS          | -38.6613   | 3.3212    | 0.3321            |
| EEL              | -360.9128  | 15.5495   | 1.5550            |
| EGB              | -743.3165  | 14.0802   | 1.4080            |
| ESURF            | 9.0695     | 0.2591    | 0.0259            |
| G gas            | -399.5741  | 15.1298   | 1.5130            |
| G solv           | -734.2470  | 14.1422   | 1.4142            |
| TOTAL            | -1133.8211 | 6.3364    | 0.6336            |

## Differences (Complex - Receptor - Ligand):

| Energy Component | Average   | Std. Dev. | Std. Err. of Mean |
|------------------|-----------|-----------|-------------------|
| VDWAALS          | -48.7277  | 5.2304    | 0.5230            |
| EEL              | -174.7994 | 30.3503   | 3.0350            |
| EGB              | 158.3046  | 26.4195   | 2.6420            |
| ESURF            | -8.7804   | 0.4273    | 0.0427            |
| DELTA G gas      | -223.5272 | 28.9961   | 2.8996            |
| DELTA G solv     | 149.5242  | 26.4105   | 2.6411            |
| DELTA TOTAL      | -74.0029  | 5.5892    | 0.5589            |

**Peptide 2 igb-1**

## GENERALIZED BORN:

## Complex:

| Energy Component | Average     | Std. Dev. | Std. Err. of Mean |
|------------------|-------------|-----------|-------------------|
| VDWAALS          | -2365.9254  | 25.7022   | 2.5702            |
| EEL              | -19343.7624 | 92.2672   | 9.2267            |
| EGB              | -3616.0456  | 62.0028   | 6.2003            |
| ESURF            | 85.3028     | 1.7374    | 0.1737            |
| G gas            | -21709.6878 | 96.1110   | 9.6111            |
| G solv           | -3530.7428  | 61.0335   | 6.1033            |
| TOTAL            | -25240.4306 | 54.7529   | 5.4753            |

## Receptor:

| Energy Component | Average     | Std. Dev. | Std. Err. of Mean |
|------------------|-------------|-----------|-------------------|
| VDWAALS          | -2300.4518  | 25.6403   | 2.5640            |
| EEL              | -18833.4582 | 91.2983   | 9.1298            |
| EGB              | -3258.0474  | 61.0987   | 6.1099            |
| ESURF            | 85.9586     | 1.7713    | 0.1771            |
| G gas            | -21133.9099 | 96.0209   | 9.6021            |
| G solv           | -3172.0888  | 60.1086   | 6.0109            |
| TOTAL            | -24305.9988 | 53.5086   | 5.3509            |

Ligand:

| Energy Component | Average   | Std. Dev. | Std. Err. of Mean |
|------------------|-----------|-----------|-------------------|
| VDWAALS          | -26.3472  | 2.2845    | 0.2284            |
| EEL              | -305.1784 | 10.2894   | 1.0289            |
| EGB              | -543.3516 | 7.8722    | 0.7872            |
| ESURF            | 7.0085    | 0.1049    | 0.0105            |
| G gas            | -331.5257 | 10.0801   | 1.0080            |
| G solv           | -536.3431 | 7.8874    | 0.7887            |
| TOTAL            | -867.8688 | 5.9346    | 0.5935            |

Differences (Complex - Receptor - Ligand):

| Energy Component | Average   | Std. Dev. | Std. Err. of Mean |
|------------------|-----------|-----------|-------------------|
| VDWAALS          | -39.1264  | 4.6093    | 0.4609            |
| EEL              | -205.1258 | 23.6197   | 2.3620            |
| EGB              | 185.3535  | 21.6323   | 2.1632            |
| ESURF            | -7.6643   | 0.2381    | 0.0238            |
| DELTA G gas      | -244.2522 | 23.4830   | 2.3483            |
| DELTA G solv     | 177.6892  | 21.5784   | 2.1578            |
| DELTA TOTAL      | -66.5630  | 4.6166    | 0.4617            |

### Peptide 3 igb-1

GENERALIZED BORN:

Complex:

| Energy Component | Average     | Std. Dev. | Std. Err. of Mean |
|------------------|-------------|-----------|-------------------|
| VDWAALS          | -2372.7968  | 22.2382   | 2.2238            |
| EEL              | -19414.3537 | 71.2354   | 7.1235            |
| EGB              | -3621.9751  | 52.2753   | 5.2275            |
| ESURF            | 86.1181     | 1.6700    | 0.1670            |
| G gas            | -21787.1505 | 76.3810   | 7.6381            |
| G solv           | -3535.8570  | 51.5356   | 5.1536            |
| TOTAL            | -25323.0074 | 57.4084   | 5.7408            |

Receptor:

| Energy Component | Average     | Std. Dev. | Std. Err. of Mean |
|------------------|-------------|-----------|-------------------|
| VDWAALS          | -2306.1603  | 21.6142   | 2.1614            |
| EEL              | -18900.0650 | 74.0593   | 7.4059            |
| EGB              | -3263.5754  | 56.7433   | 5.6743            |
| ESURF            | 86.9758     | 1.6523    | 0.1652            |
| G gas            | -21206.2253 | 79.0220   | 7.9022            |
| G solv           | -3176.5996  | 55.9666   | 5.5967            |
| TOTAL            | -24382.8249 | 57.0443   | 5.7044            |

Ligand:

| Energy Component | Average   | Std. Dev. | Std. Err. of Mean |
|------------------|-----------|-----------|-------------------|
| VDWAALS          | -26.7666  | 2.4583    | 0.2458            |
| EEL              | -316.0507 | 9.1415    | 0.9141            |
| EGB              | -535.6351 | 6.5910    | 0.6591            |
| ESURF            | 6.9413    | 0.1029    | 0.0103            |
| G gas            | -342.8174 | 8.8522    | 0.8852            |
| G solv           | -528.6938 | 6.5883    | 0.6588            |
| TOTAL            | -871.5112 | 4.8431    | 0.4843            |

Differences (Complex - Receptor - Ligand):

| Energy Component | Average   | Std. Dev. | Std. Err. of Mean |
|------------------|-----------|-----------|-------------------|
| VDWAALS          | -39.8698  | 4.5286    | 0.4529            |
| EEL              | -198.2380 | 24.0007   | 2.4001            |
| EGB              | 177.2354  | 22.2016   | 2.2202            |
| ESURF            | -7.7990   | 0.2136    | 0.0214            |
| DELTA G gas      | -238.1078 | 23.9112   | 2.3911            |
| DELTA G solv     | 169.4364  | 22.1819   | 2.2182            |
| DELTA TOTAL      | -68.6714  | 4.5578    | 0.4558            |

**Peptide 4 igb-1**

GENERALIZED BORN:

## Complex:

| Energy Component | Average     | Std. Dev. | Std. Err. of Mean |
|------------------|-------------|-----------|-------------------|
| VDWAALS          | -2381.5894  | 21.5241   | 3.0440            |
| EEL              | -19390.8774 | 80.3311   | 11.3605           |
| EGB              | -3757.1154  | 48.7798   | 6.8985            |
| ESURF            | 83.4579     | 1.3514    | 0.1911            |
| G gas            | -21772.4668 | 83.5272   | 11.8125           |
| G solv           | -3673.6575  | 48.4724   | 6.8550            |
| TOTAL            | -25446.1243 | 47.3785   | 6.7003            |

## Receptor:

| Energy Component | Average     | Std. Dev. | Std. Err. of Mean |
|------------------|-------------|-----------|-------------------|
| VDWAALS          | -2312.0231  | 21.7712   | 3.0789            |
| EEL              | -18971.5945 | 71.3050   | 10.0841           |
| EGB              | -3225.6353  | 43.8747   | 6.2048            |
| ESURF            | 84.6543     | 1.2721    | 0.1799            |
| G gas            | -21283.6176 | 74.5703   | 10.5458           |
| G solv           | -3140.9811  | 43.4877   | 6.1501            |
| TOTAL            | -24424.5986 | 45.6611   | 6.4575            |

## Ligand:

| Energy Component | Average   | Std. Dev. | Std. Err. of Mean |
|------------------|-----------|-----------|-------------------|
| VDWAALS          | -23.5725  | 1.8489    | 0.2615            |
| EEL              | -150.3608 | 11.6977   | 1.6543            |
| EGB              | -770.7494 | 8.6775    | 1.2272            |
| ESURF            | 7.6679    | 0.1336    | 0.0189            |
| G gas            | -173.9334 | 11.5724   | 1.6366            |
| G solv           | -763.0815 | 8.7051    | 1.2311            |
| TOTAL            | -937.0149 | 5.4309    | 0.7680            |

## Differences (Complex - Receptor - Ligand):

| Energy Component | Average | Std. Dev. | Std. Err. of Mean |
|------------------|---------|-----------|-------------------|
|------------------|---------|-----------|-------------------|

|              |           |         |        |
|--------------|-----------|---------|--------|
| VDWAALS      | -45.9938  | 5.1660  | 0.7306 |
| EEL          | -268.9221 | 30.8589 | 4.3641 |
| EGB          | 239.2694  | 26.1957 | 3.7046 |
| ESURF        | -8.8643   | 0.3868  | 0.0547 |
| DELTA G gas  | -314.9159 | 29.9961 | 4.2421 |
| DELTA G solv | 230.4051  | 26.0692 | 3.6867 |
| DELTA TOTAL  | -84.5108  | 6.4974  | 0.9189 |

### Peptide 5 igb-1

GENERALIZED BORN:

Complex:

| Energy Component | Average     | Std. Dev. | Std. Err. of Mean |
|------------------|-------------|-----------|-------------------|
| VDWAALS          | -2410.7302  | 22.5309   | 2.2531            |
| EEL              | -19976.5849 | 69.9237   | 6.9924            |
| EGB              | -3425.2152  | 49.7798   | 4.9780            |
| ESURF            | 91.1540     | 1.7170    | 0.1717            |
| G gas            | -22387.3151 | 70.2434   | 7.0243            |
| G solv           | -3334.0612  | 49.3053   | 4.9305            |
| TOTAL            | -25721.3763 | 47.6990   | 4.7699            |

Receptor:

| Energy Component | Average     | Std. Dev. | Std. Err. of Mean |
|------------------|-------------|-----------|-------------------|
| VDWAALS          | -2319.8026  | 21.9843   | 2.1984            |
| EEL              | -19402.3346 | 66.7774   | 6.6777            |
| EGB              | -3257.9934  | 49.0804   | 4.9080            |
| ESURF            | 91.8210     | 1.7732    | 0.1773            |
| G gas            | -21722.1372 | 67.2576   | 6.7258            |
| G solv           | -3166.1724  | 48.4628   | 4.8463            |
| TOTAL            | -24888.3096 | 46.4667   | 4.6467            |

Ligand:

| Energy Component | Average | Std. Dev. | Std. Err. of Mean |
|------------------|---------|-----------|-------------------|
|------------------|---------|-----------|-------------------|



| Energy Component | Average   | Std. Dev. | Std. Err. of Mean |
|------------------|-----------|-----------|-------------------|
| VDWAALS          | -37.5985  | 3.5105    | 0.3510            |
| EEL              | -432.5804 | 31.9942   | 3.1994            |
| EGB              | -313.2388 | 26.7248   | 2.6725            |
| ESURF            | 7.8249    | 0.2990    | 0.0299            |
| G gas            | -470.1789 | 30.9907   | 3.0991            |
| G solv           | -305.4139 | 26.5926   | 2.6593            |
| TOTAL            | -775.5928 | 7.6828    | 0.7683            |

Differences (Complex - Receptor - Ligand):

| Energy Component | Average   | Std. Dev. | Std. Err. of Mean |
|------------------|-----------|-----------|-------------------|
| VDWAALS          | -53.3292  | 4.2783    | 0.4278            |
| EEL              | -141.6698 | 31.7486   | 3.1749            |
| EGB              | 146.0170  | 27.7487   | 2.7749            |
| ESURF            | -8.4920   | 0.4119    | 0.0412            |
| DELTA G gas      | -194.9990 | 31.7190   | 3.1719            |
| DELTA G solv     | 137.5251  | 27.5909   | 2.7591            |
| DELTA TOTAL      | -57.4740  | 6.6157    | 0.6616            |

**Peptide 6 igb-1**

GENERALIZED BORN:

Complex:

| Energy Component | Average     | Std. Dev. | Std. Err. of Mean |
|------------------|-------------|-----------|-------------------|
| VDWAALS          | -2428.5611  | 21.8551   | 2.1855            |
| EEL              | -20010.2669 | 96.1764   | 9.6176            |
| EGB              | -3520.7227  | 58.4202   | 5.8420            |
| ESURF            | 89.0645     | 1.5383    | 0.1538            |
| G gas            | -22438.8280 | 92.3950   | 9.2395            |
| G solv           | -3431.6582  | 57.9599   | 5.7960            |
| TOTAL            | -25870.4862 | 57.0984   | 5.7098            |

Receptor:

| Energy Component | Average     | Std. Dev. | Std. Err. of Mean |
|------------------|-------------|-----------|-------------------|
| VDWAALS          | -2342.0129  | 22.2165   | 2.2216            |
| EEL              | -19398.0455 | 90.5244   | 9.0524            |
| EGB              | -3296.0690  | 62.7198   | 6.2720            |
| ESURF            | 90.4213     | 1.6801    | 0.1680            |
| G gas            | -21740.0584 | 88.4823   | 8.8482            |
| G solv           | -3205.6477  | 61.9630   | 6.1963            |
| TOTAL            | -24945.7060 | 57.1052   | 5.7105            |

Ligand:

| Energy Component | Average   | Std. Dev. | Std. Err. of Mean |
|------------------|-----------|-----------|-------------------|
| VDWAALS          | -32.6770  | 2.4083    | 0.2408            |
| EEL              | -445.3235 | 9.9760    | 0.9976            |
| EGB              | -394.1839 | 7.7668    | 0.7767            |
| ESURF            | 7.4127    | 0.1429    | 0.0143            |
| G gas            | -478.0005 | 10.2636   | 1.0264            |
| G solv           | -386.7712 | 7.7588    | 0.7759            |
| TOTAL            | -864.7717 | 5.0326    | 0.5033            |

Differences (Complex - Receptor - Ligand):

| Energy Component | Average   | Std. Dev. | Std. Err. of Mean |
|------------------|-----------|-----------|-------------------|
| VDWAALS          | -53.8713  | 4.9699    | 0.4970            |
| EEL              | -166.8979 | 33.1336   | 3.3134            |
| EGB              | 169.5301  | 29.2110   | 2.9211            |
| ESURF            | -8.7695   | 0.3383    | 0.0338            |
| DELTA G gas      | -220.7692 | 33.3965   | 3.3396            |
| DELTA G solv     | 160.7607  | 29.1283   | 2.9128            |
| DELTA TOTAL      | -60.0085  | 6.1963    | 0.6196            |

**Peptide 7 igb-1**

GENERALIZED BORN:

## Complex:

| Energy Component | Average     | Std. Dev. | Std. Err. of Mean |
|------------------|-------------|-----------|-------------------|
| VDWAALS          | -2373.3748  | 19.5314   | 1.9531            |
| EEL              | -19513.0766 | 85.5949   | 8.5595            |
| EGB              | -3420.2210  | 59.3700   | 5.9370            |
| ESURF            | 84.3971     | 1.7785    | 0.1778            |
| G gas            | -21886.4514 | 88.3930   | 8.8393            |
| G solv           | -3335.8239  | 58.4079   | 5.8408            |
| TOTAL            | -25222.2752 | 52.8180   | 5.2818            |

## Receptor:

| Energy Component | Average     | Std. Dev. | Std. Err. of Mean |
|------------------|-------------|-----------|-------------------|
| VDWAALS          | -2306.6445  | 19.6232   | 1.9623            |
| EEL              | -18863.9705 | 82.0675   | 8.2067            |
| EGB              | -3248.3713  | 59.0588   | 5.9059            |
| ESURF            | 85.5950     | 1.8224    | 0.1822            |
| G gas            | -21170.6151 | 83.9460   | 8.3946            |
| G solv           | -3162.7762  | 58.1407   | 5.8141            |
| TOTAL            | -24333.3913 | 50.7157   | 5.0716            |

## Ligand:

| Energy Component | Average   | Std. Dev. | Std. Err. of Mean |
|------------------|-----------|-----------|-------------------|
| VDWAALS          | -28.5069  | 2.5135    | 0.2514            |
| EEL              | -432.0760 | 9.5044    | 0.9504            |
| EGB              | -364.7793 | 6.1559    | 0.6156            |
| ESURF            | 6.6085    | 0.1257    | 0.0126            |
| G gas            | -460.5828 | 8.9930    | 0.8993            |
| G solv           | -358.1707 | 6.1892    | 0.6189            |
| TOTAL            | -818.7536 | 6.1020    | 0.6102            |

## Differences (Complex - Receptor - Ligand):

| Energy Component | Average | Std. Dev. | Std. Err. of Mean |
|------------------|---------|-----------|-------------------|
|------------------|---------|-----------|-------------------|

| Energy Component | Average   | Std. Dev. | Std. Err. of Mean |
|------------------|-----------|-----------|-------------------|
| VDWAALS          | -38.2234  | 4.1597    | 0.4160            |
| EEL              | -217.0301 | 22.7958   | 2.2796            |
| EGB              | 192.9295  | 18.8847   | 1.8885            |
| ESURF            | -7.8064   | 0.2085    | 0.0208            |
| DELTA G gas      | -255.2534 | 22.4536   | 2.2454            |
| DELTA G solv     | 185.1231  | 18.8408   | 1.8841            |
| DELTA TOTAL      | -70.1303  | 5.6924    | 0.5692            |

### Peptide 8 igb-1

#### GENERALIZED BORN:

#### Complex:

| Energy Component | Average     | Std. Dev. | Std. Err. of Mean |
|------------------|-------------|-----------|-------------------|
| VDWAALS          | -2365.0862  | 24.0405   | 2.4040            |
| EEL              | -19455.9444 | 79.2695   | 7.9269            |
| EGB              | -3328.7018  | 54.8367   | 5.4837            |
| ESURF            | 84.9921     | 1.5940    | 0.1594            |
| G gas            | -21821.0306 | 79.6009   | 7.9601            |
| G solv           | -3243.7096  | 53.9540   | 5.3954            |
| TOTAL            | -25064.7403 | 47.3151   | 4.7315            |

#### Receptor:

| Energy Component | Average     | Std. Dev. | Std. Err. of Mean |
|------------------|-------------|-----------|-------------------|
| VDWAALS          | -2296.9349  | 22.6356   | 2.2636            |
| EEL              | -18830.2014 | 77.3166   | 7.7317            |
| EGB              | -3273.6541  | 54.6295   | 5.4630            |
| ESURF            | 86.0281     | 1.4853    | 0.1485            |
| G gas            | -21127.1363 | 78.1207   | 7.8121            |
| G solv           | -3187.6260  | 53.8202   | 5.3820            |
| TOTAL            | -24314.7623 | 45.7782   | 4.5778            |

#### Ligand:

| Energy Component | Average | Std. Dev. | Std. Err. of Mean |
|------------------|---------|-----------|-------------------|
|------------------|---------|-----------|-------------------|

| Energy Component | Average   | Std. Dev. | Std. Err. of Mean |
|------------------|-----------|-----------|-------------------|
| VDWAALS          | -27.8320  | 2.2793    | 0.2279            |
| EEL              | -432.0952 | 8.3616    | 0.8362            |
| EGB              | -226.3780 | 4.9662    | 0.4966            |
| ESURF            | 6.7786    | 0.0937    | 0.0094            |
| G gas            | -459.9272 | 7.8451    | 0.7845            |
| G solv           | -219.5994 | 4.9246    | 0.4925            |
| TOTAL            | -679.5266 | 5.4744    | 0.5474            |

Differences (Complex - Receptor - Ligand):

| Energy Component | Average   | Std. Dev. | Std. Err. of Mean |
|------------------|-----------|-----------|-------------------|
| VDWAALS          | -40.3192  | 4.3294    | 0.4329            |
| EEL              | -193.6479 | 20.2977   | 2.0298            |
| EGB              | 171.3304  | 14.2423   | 1.4242            |
| ESURF            | -7.8146   | 0.2948    | 0.0295            |
| DELTA G gas      | -233.9671 | 19.1044   | 1.9104            |
| DELTA G solv     | 163.5157  | 14.1251   | 1.4125            |
| DELTA TOTAL      | -70.4514  | 6.6106    | 0.6611            |

**Peptide 1 igb-2**

GENERALIZED BORN:

Complex:

| Energy Component | Average     | Std. Dev. | Std. Err. of Mean |
|------------------|-------------|-----------|-------------------|
| VDWAALS          | -2387.6512  | 19.1768   | 1.9177            |
| EEL              | -19412.2893 | 68.1303   | 6.8130            |
| EGB              | -3837.9984  | 51.5100   | 5.1510            |
| ESURF            | 87.8151     | 1.4902    | 0.1490            |
| G gas            | -21799.9405 | 68.8024   | 6.8802            |
| G solv           | -3750.1832  | 50.7985   | 5.0799            |
| TOTAL            | -25550.1237 | 48.5215   | 4.8521            |

Receptor:

| Energy Component | Average     | Std. Dev. | Std. Err. of Mean |
|------------------|-------------|-----------|-------------------|
| VDWAALS          | -2300.2622  | 19.2031   | 1.9203            |
| EEL              | -18876.5771 | 63.8142   | 6.3814            |
| EGB              | -3251.7384  | 46.5225   | 4.6523            |
| ESURF            | 87.5260     | 1.4371    | 0.1437            |
| G gas            | -21176.8392 | 63.5484   | 6.3548            |
| G solv           | -3164.2124  | 45.8408   | 4.5841            |
| TOTAL            | -24341.0516 | 49.1010   | 4.9101            |

Ligand:

| Energy Component | Average    | Std. Dev. | Std. Err. of Mean |
|------------------|------------|-----------|-------------------|
| VDWAALS          | -38.6613   | 3.3212    | 0.3321            |
| EEL              | -360.9128  | 15.5495   | 1.5550            |
| EGB              | -757.6278  | 14.0959   | 1.4096            |
| ESURF            | 9.0695     | 0.2591    | 0.0259            |
| G gas            | -399.5741  | 15.1298   | 1.5130            |
| G solv           | -748.5583  | 14.1607   | 1.4161            |
| TOTAL            | -1148.1324 | 6.3817    | 0.6382            |

Differences (Complex - Receptor - Ligand):

| Energy Component | Average   | Std. Dev. | Std. Err. of Mean |
|------------------|-----------|-----------|-------------------|
| VDWAALS          | -48.7277  | 5.2304    | 0.5230            |
| EEL              | -174.7994 | 30.3503   | 3.0350            |
| EGB              | 171.3678  | 26.6072   | 2.6607            |
| ESURF            | -8.7804   | 0.4273    | 0.0427            |
| DELTA G gas      | -223.5272 | 28.9961   | 2.8996            |
| DELTA G solv     | 162.5874  | 26.5922   | 2.6592            |
| DELTA TOTAL      | -60.9398  | 5.6462    | 0.5646            |

### Peptide 2 igb-2

GENERALIZED BORN:

Complex:

| Energy Component | Average     | Std. Dev. | Std. Err. of Mean |
|------------------|-------------|-----------|-------------------|
| VDWAALS          | -2378.5549  | 20.7896   | 2.0790            |
| EEL              | -19339.8113 | 97.1504   | 9.7150            |
| EGB              | -3733.9895  | 69.9941   | 6.9994            |
| ESURF            | 84.3201     | 1.6615    | 0.1662            |
| G gas            | -21718.3662 | 98.2870   | 9.8287            |
| G solv           | -3649.6694  | 69.0593   | 6.9059            |
| TOTAL            | -25368.0356 | 56.7181   | 5.6718            |

Receptor:

| Energy Component | Average     | Std. Dev. | Std. Err. of Mean |
|------------------|-------------|-----------|-------------------|
| VDWAALS          | -2308.4386  | 20.9152   | 2.0915            |
| EEL              | -18938.8381 | 78.2528   | 7.8253            |
| EGB              | -3186.0391  | 56.1606   | 5.6161            |
| ESURF            | 85.3106     | 1.5559    | 0.1556            |
| G gas            | -21247.2767 | 80.2170   | 8.0217            |
| G solv           | -3100.7285  | 55.3714   | 5.5371            |
| TOTAL            | -24348.0052 | 54.8478   | 5.4848            |

Ligand:

| Energy Component | Average   | Std. Dev. | Std. Err. of Mean |
|------------------|-----------|-----------|-------------------|
| VDWAALS          | -24.6937  | 2.8847    | 0.2885            |
| EEL              | -158.2946 | 16.4590   | 1.6459            |
| EGB              | -778.8312 | 13.7461   | 1.3746            |
| ESURF            | 7.6617    | 0.1795    | 0.0179            |
| G gas            | -182.9883 | 17.4301   | 1.7430            |
| G solv           | -771.1695 | 13.7750   | 1.3775            |
| TOTAL            | -954.1578 | 6.0228    | 0.6023            |

Differences (Complex - Receptor - Ligand):

| Energy Component | Average | Std. Dev. | Std. Err. of Mean |
|------------------|---------|-----------|-------------------|
|------------------|---------|-----------|-------------------|

|              |           |         |        |
|--------------|-----------|---------|--------|
| VDWAALS      | -45.4226  | 5.0439  | 0.5044 |
| EEL          | -242.6786 | 45.5502 | 4.5550 |
| EGB          | 230.8808  | 40.7382 | 4.0738 |
| ESURF        | -8.6522   | 0.5012  | 0.0501 |
| DELTA G gas  | -288.1012 | 45.8605 | 4.5861 |
| DELTA G solv | 222.2286  | 40.4866 | 4.0487 |
| DELTA TOTAL  | -65.8726  | 7.9987  | 0.7999 |

### Peptide 3 igb-2

GENERALIZED BORN:

Complex:

| Energy Component | Average     | Std. Dev. | Std. Err. of Mean |
|------------------|-------------|-----------|-------------------|
| VDWAALS          | -2372.7968  | 22.2382   | 2.2238            |
| EEL              | -19414.3537 | 71.2354   | 7.1235            |
| EGB              | -3571.8338  | 54.9110   | 5.4911            |
| ESURF            | 86.1181     | 1.6700    | 0.1670            |
| G gas            | -21787.1505 | 76.3810   | 7.6381            |
| G solv           | -3485.7156  | 54.1105   | 5.4110            |
| TOTAL            | -25272.8661 | 57.3637   | 5.7364            |

Receptor:

| Energy Component | Average     | Std. Dev. | Std. Err. of Mean |
|------------------|-------------|-----------|-------------------|
| VDWAALS          | -2306.1603  | 21.6142   | 2.1614            |
| EEL              | -18900.0650 | 74.0593   | 7.4059            |
| EGB              | -3213.7560  | 59.1692   | 5.9169            |
| ESURF            | 86.9758     | 1.6523    | 0.1652            |
| G gas            | -21206.2253 | 79.0220   | 7.9022            |
| G solv           | -3126.7802  | 58.3407   | 5.8341            |
| TOTAL            | -24333.0054 | 56.8839   | 5.6884            |

Ligand:

| Energy Component | Average | Std. Dev. | Std. Err. of Mean |
|------------------|---------|-----------|-------------------|
| -----            |         |           |                   |



|         |           |        |        |
|---------|-----------|--------|--------|
| VDWAALS | -26.7666  | 2.4583 | 0.2458 |
| EEL     | -316.0507 | 9.1415 | 0.9141 |
| EGB     | -546.9074 | 6.7563 | 0.6756 |
| ESURF   | 6.9413    | 0.1029 | 0.0103 |
| G gas   | -342.8174 | 8.8522 | 0.8852 |
| G solv  | -539.9661 | 6.7513 | 0.6751 |
| TOTAL   | -882.7835 | 4.7902 | 0.4790 |

Differences (Complex - Receptor - Ligand):

| Energy Component | Average   | Std. Dev. | Std. Err. of Mean |
|------------------|-----------|-----------|-------------------|
| VDWAALS          | -39.8698  | 4.5286    | 0.4529            |
| EEL              | -198.2380 | 24.0007   | 2.4001            |
| EGB              | 188.8296  | 22.2794   | 2.2279            |
| ESURF            | -7.7990   | 0.2136    | 0.0214            |
| DELTA G gas      | -238.1078 | 23.9112   | 2.3911            |
| DELTA G solv     | 181.0306  | 22.2565   | 2.2256            |
| DELTA TOTAL      | -57.0772  | 4.9676    | 0.4968            |

**Peptide 4 igb-2**

GENERALIZED BORN:

Complex:

| Energy Component | Average     | Std. Dev. | Std. Err. of Mean |
|------------------|-------------|-----------|-------------------|
| VDWAALS          | -2365.9254  | 25.7022   | 2.5702            |
| EEL              | -19343.7624 | 92.2672   | 9.2267            |
| EGB              | -3568.0835  | 64.8595   | 6.4859            |
| ESURF            | 85.3028     | 1.7374    | 0.1737            |
| G gas            | -21709.6878 | 96.1110   | 9.6111            |
| G solv           | -3482.7807  | 63.8492   | 6.3849            |
| TOTAL            | -25192.4685 | 53.2679   | 5.3268            |

Receptor:

| Energy Component | Average | Std. Dev. | Std. Err. of Mean |
|------------------|---------|-----------|-------------------|
|------------------|---------|-----------|-------------------|

|         |             |         |        |
|---------|-------------|---------|--------|
| VDWAALS | -2300.4518  | 25.6403 | 2.5640 |
| EEL     | -18833.4582 | 91.2983 | 9.1298 |
| EGB     | -3210.6857  | 64.0533 | 6.4053 |
| ESURF   | 85.9586     | 1.7713  | 0.1771 |
| G gas   | -21133.9099 | 96.0209 | 9.6021 |
| G solv  | -3124.7272  | 63.0258 | 6.3026 |
| TOTAL   | -24258.6371 | 52.0751 | 5.2075 |

Ligand:

| Energy Component | Average   | Std. Dev. | Std. Err. of Mean |
|------------------|-----------|-----------|-------------------|
| VDWAALS          | -26.3472  | 2.2845    | 0.2284            |
| EEL              | -305.1784 | 10.2894   | 1.0289            |
| EGB              | -554.5658 | 8.0586    | 0.8059            |
| ESURF            | 7.0085    | 0.1049    | 0.0105            |
| G gas            | -331.5257 | 10.0801   | 1.0080            |
| G solv           | -547.5573 | 8.0733    | 0.8073            |
| TOTAL            | -879.0830 | 5.9685    | 0.5968            |

Differences (Complex - Receptor - Ligand):

| Energy Component | Average   | Std. Dev. | Std. Err. of Mean |
|------------------|-----------|-----------|-------------------|
| VDWAALS          | -39.1264  | 4.6093    | 0.4609            |
| EEL              | -205.1258 | 23.6197   | 2.3620            |
| EGB              | 197.1681  | 21.6982   | 2.1698            |
| ESURF            | -7.6643   | 0.2381    | 0.0238            |
| DELTA G gas      | -244.2522 | 23.4830   | 2.3483            |
| DELTA G solv     | 189.5038  | 21.6415   | 2.1641            |
| DELTA TOTAL      | -54.7484  | 4.8695    | 0.4870            |

### Peptide 5 igb-2

GENERALIZED BORN:

Complex:

| Energy Component | Average | Std. Dev. | Std. Err. of Mean |
|------------------|---------|-----------|-------------------|
| -----            |         |           |                   |

|         |             |         |        |
|---------|-------------|---------|--------|
| VDWAALS | -2410.7302  | 22.5309 | 2.2531 |
| EEL     | -19976.5849 | 69.9237 | 6.9924 |
| EGB     | -3366.1688  | 51.9427 | 5.1943 |
| ESURF   | 91.1540     | 1.7170  | 0.1717 |
| G gas   | -22387.3151 | 70.2434 | 7.0243 |
| G solv  | -3275.0148  | 51.3961 | 5.1396 |
| TOTAL   | -25662.3299 | 47.5183 | 4.7518 |

Receptor:

| Energy Component | Average     | Std. Dev. | Std. Err. of Mean |
|------------------|-------------|-----------|-------------------|
| VDWAALS          | -2319.8026  | 21.9843   | 2.1984            |
| EEL              | -19402.3346 | 66.7774   | 6.6777            |
| EGB              | -3203.2646  | 50.8421   | 5.0842            |
| ESURF            | 91.8210     | 1.7732    | 0.1773            |
| G gas            | -21722.1372 | 67.2576   | 6.7258            |
| G solv           | -3111.4436  | 50.1558   | 5.0156            |
| TOTAL            | -24833.5807 | 46.3490   | 4.6349            |

Ligand:

| Energy Component | Average   | Std. Dev. | Std. Err. of Mean |
|------------------|-----------|-----------|-------------------|
| VDWAALS          | -37.5985  | 3.5105    | 0.3510            |
| EEL              | -432.5804 | 31.9942   | 3.1994            |
| EGB              | -323.5119 | 27.3982   | 2.7398            |
| ESURF            | 7.8249    | 0.2990    | 0.0299            |
| G gas            | -470.1789 | 30.9907   | 3.0991            |
| G solv           | -315.6870 | 27.2636   | 2.7264            |
| TOTAL            | -785.8659 | 7.4441    | 0.7444            |

Differences (Complex - Receptor - Ligand):

| Energy Component | Average   | Std. Dev. | Std. Err. of Mean |
|------------------|-----------|-----------|-------------------|
| VDWAALS          | -53.3292  | 4.2783    | 0.4278            |
| EEL              | -141.6698 | 31.7486   | 3.1749            |

|              |           |         |        |
|--------------|-----------|---------|--------|
| EGB          | 160.6078  | 28.3868 | 2.8387 |
| ESURF        | -8.4920   | 0.4119  | 0.0412 |
| DELTA G gas  | -194.9990 | 31.7190 | 3.1719 |
| DELTA G solv | 152.1158  | 28.2257 | 2.8226 |
| DELTA TOTAL  | -42.8832  | 6.4195  | 0.6419 |

### Peptide 6 igb-2

#### GENERALIZED BORN:

##### Complex:

| Energy Component | Average     | Std. Dev. | Std. Err. of Mean |
|------------------|-------------|-----------|-------------------|
| VDWAALS          | -2428.5611  | 21.8551   | 2.1855            |
| EEL              | -20010.2669 | 96.1764   | 9.6176            |
| EGB              | -3464.1892  | 60.3228   | 6.0323            |
| ESURF            | 89.0645     | 1.5383    | 0.1538            |
| G gas            | -22438.8280 | 92.3950   | 9.2395            |
| G solv           | -3375.1247  | 59.7928   | 5.9793            |
| TOTAL            | -25813.9527 | 58.1237   | 5.8124            |

##### Receptor:

| Energy Component | Average     | Std. Dev. | Std. Err. of Mean |
|------------------|-------------|-----------|-------------------|
| VDWAALS          | -2342.0129  | 22.2165   | 2.2216            |
| EEL              | -19398.0455 | 90.5244   | 9.0524            |
| EGB              | -3242.8578  | 65.4153   | 6.5415            |
| ESURF            | 90.4213     | 1.6801    | 0.1680            |
| G gas            | -21740.0584 | 88.4823   | 8.8482            |
| G solv           | -3152.4365  | 64.5890   | 6.4589            |
| TOTAL            | -24892.4948 | 57.6932   | 5.7693            |

##### Ligand:

| Energy Component | Average | Std. Dev. | Std. Err. of Mean |
|------------------|---------|-----------|-------------------|
| -----            |         |           |                   |

|         |           |         |        |
|---------|-----------|---------|--------|
| VDWAALS | -32.6770  | 2.4083  | 0.2408 |
| EEL     | -445.3235 | 9.9760  | 0.9976 |
| EGB     | -404.3625 | 8.0236  | 0.8024 |
| ESURF   | 7.4127    | 0.1429  | 0.0143 |
| G gas   | -478.0005 | 10.2636 | 1.0264 |
| G solv  | -396.9499 | 8.0132  | 0.8013 |
| TOTAL   | -874.9504 | 4.9374  | 0.4937 |

Differences (Complex - Receptor - Ligand):

| Energy Component | Average   | Std. Dev. | Std. Err. of Mean |
|------------------|-----------|-----------|-------------------|
| VDWAALS          | -53.8713  | 4.9699    | 0.4970            |
| EEL              | -166.8979 | 33.1336   | 3.3134            |
| EGB              | 183.0311  | 29.2405   | 2.9240            |
| ESURF            | -8.7695   | 0.3383    | 0.0338            |
| DELTA G gas      | -220.7692 | 33.3965   | 3.3396            |
| DELTA G solv     | 174.2617  | 29.1531   | 2.9153            |
| DELTA TOTAL      | -46.5075  | 6.3639    | 0.6364            |

**Peptide 7 igb-2**

GENERALIZED BORN:

Complex:

| Energy Component | Average     | Std. Dev. | Std. Err. of Mean |
|------------------|-------------|-----------|-------------------|
| VDWAALS          | -2373.3748  | 19.5314   | 1.9531            |
| EEL              | -19513.0766 | 85.5949   | 8.5595            |
| EGB              | -3367.3294  | 62.7889   | 6.2789            |
| ESURF            | 84.3971     | 1.7785    | 0.1778            |
| G gas            | -21886.4514 | 88.3930   | 8.8393            |
| G solv           | -3282.9323  | 61.7923   | 6.1792            |
| TOTAL            | -25169.3837 | 51.2235   | 5.1223            |

Receptor:

| Energy Component | Average     | Std. Dev. | Std. Err. of Mean |
|------------------|-------------|-----------|-------------------|
| VDWAALS          | -2306.6445  | 19.6232   | 1.9623            |
| EEL              | -18863.9705 | 82.0675   | 8.2067            |
| EGB              | -3199.0725  | 62.1223   | 6.2122            |
| ESURF            | 85.5950     | 1.8224    | 0.1822            |
| G gas            | -21170.6151 | 83.9460   | 8.3946            |
| G solv           | -3113.4774  | 61.1694   | 6.1169            |
| TOTAL            | -24284.0925 | 49.3688   | 4.9369            |

Ligand:

| Energy Component | Average   | Std. Dev. | Std. Err. of Mean |
|------------------|-----------|-----------|-------------------|
| VDWAALS          | -28.5069  | 2.5135    | 0.2514            |
| EEL              | -432.0760 | 9.5044    | 0.9504            |
| EGB              | -374.8029 | 6.2355    | 0.6235            |
| ESURF            | 6.6085    | 0.1257    | 0.0126            |
| G gas            | -460.5828 | 8.9930    | 0.8993            |
| G solv           | -368.1944 | 6.2671    | 0.6267            |
| TOTAL            | -828.7773 | 6.1326    | 0.6133            |

Differences (Complex - Receptor - Ligand):

| Energy Component | Average   | Std. Dev. | Std. Err. of Mean |
|------------------|-----------|-----------|-------------------|
| VDWAALS          | -38.2234  | 4.1597    | 0.4160            |
| EEL              | -217.0301 | 22.7958   | 2.2796            |
| EGB              | 206.5460  | 19.1049   | 1.9105            |
| ESURF            | -7.8064   | 0.2085    | 0.0208            |
| DELTA G gas      | -255.2534 | 22.4536   | 2.2454            |
| DELTA G solv     | 198.7395  | 19.0583   | 1.9058            |
| DELTA TOTAL      | -56.5139  | 5.7148    | 0.5715            |

**Peptide 8 igb-2**

## GENERALIZED BORN:

## Complex:

| Energy Component | Average     | Std. Dev. | Std. Err. of Mean |
|------------------|-------------|-----------|-------------------|
| VDWAALS          | -2365.0862  | 24.0405   | 2.4040            |
| EEL              | -19455.9444 | 79.2695   | 7.9269            |
| EGB              | -3276.2284  | 57.2828   | 5.7283            |
| ESURF            | 84.9921     | 1.5940    | 0.1594            |
| G gas            | -21821.0306 | 79.6009   | 7.9601            |
| G solv           | -3191.2362  | 56.3507   | 5.6351            |
| TOTAL            | -25012.2669 | 47.3559   | 4.7356            |

## Receptor:

| Energy Component | Average     | Std. Dev. | Std. Err. of Mean |
|------------------|-------------|-----------|-------------------|
| VDWAALS          | -2296.9349  | 22.6356   | 2.2636            |
| EEL              | -18830.2014 | 77.3166   | 7.7317            |
| EGB              | -3226.8511  | 57.1244   | 5.7124            |
| ESURF            | 86.0281     | 1.4853    | 0.1485            |
| G gas            | -21127.1363 | 78.1207   | 7.8121            |
| G solv           | -3140.8230  | 56.2720   | 5.6272            |
| TOTAL            | -24267.9593 | 45.6806   | 4.5681            |

## Ligand:

| Energy Component | Average   | Std. Dev. | Std. Err. of Mean |
|------------------|-----------|-----------|-------------------|
| VDWAALS          | -27.8320  | 2.2793    | 0.2279            |
| EEL              | -432.0952 | 8.3616    | 0.8362            |
| EGB              | -234.3917 | 5.0876    | 0.5088            |
| ESURF            | 6.7786    | 0.0937    | 0.0094            |
| G gas            | -459.9272 | 7.8451    | 0.7845            |
| G solv           | -227.6130 | 5.0450    | 0.5045            |
| TOTAL            | -687.5402 | 5.4754    | 0.5475            |

## Differences (Complex - Receptor - Ligand):

| Energy Component | Average   | Std. Dev. | Std. Err. of Mean |
|------------------|-----------|-----------|-------------------|
| VDWAALS          | -40.3192  | 4.3294    | 0.4329            |
| EEL              | -193.6479 | 20.2977   | 2.0298            |
| EGB              | 185.0144  | 14.3825   | 1.4383            |
| ESURF            | -7.8146   | 0.2948    | 0.0295            |
| DELTA G gas      | -233.9671 | 19.1044   | 1.9104            |
| DELTA G solv     | 177.1997  | 14.2551   | 1.4255            |
| DELTA TOTAL      | -56.7674  | 6.6094    | 0.6609            |

**Peptide 1 igb-5**

## GENERALIZED BORN:

## Complex:

| Energy Component | Average     | Std. Dev. | Std. Err. of Mean |
|------------------|-------------|-----------|-------------------|
| VDWAALS          | -2387.6512  | 19.1768   | 1.9177            |
| EEL              | -19412.2893 | 68.1303   | 6.8130            |
| EGB              | -3501.3327  | 50.5951   | 5.0595            |
| ESURF            | 87.8151     | 1.4902    | 0.1490            |
| G gas            | -21799.9405 | 68.8024   | 6.8802            |
| G solv           | -3413.5176  | 49.9023   | 4.9902            |
| TOTAL            | -25213.4581 | 50.3001   | 5.0300            |

## Receptor:

| Energy Component | Average     | Std. Dev. | Std. Err. of Mean |
|------------------|-------------|-----------|-------------------|
| VDWAALS          | -2300.2622  | 19.2031   | 1.9203            |
| EEL              | -18876.5771 | 63.8142   | 6.3814            |
| EGB              | -2920.6617  | 45.5063   | 4.5506            |
| ESURF            | 87.5260     | 1.4371    | 0.1437            |
| G gas            | -21176.8392 | 63.5484   | 6.3548            |
| G solv           | -2833.1357  | 44.8404   | 4.4840            |



|       |             |         |        |
|-------|-------------|---------|--------|
| TOTAL | -24009.9749 | 51.0301 | 5.1030 |
|-------|-------------|---------|--------|

Ligand:

| Energy Component | Average    | Std. Dev. | Std. Err. of Mean |
|------------------|------------|-----------|-------------------|
| VDWAALS          | -38.6613   | 3.3212    | 0.3321            |
| EEL              | -360.9128  | 15.5495   | 1.5550            |
| EGB              | -746.5294  | 14.1139   | 1.4114            |
| ESURF            | 9.0695     | 0.2591    | 0.0259            |
| G gas            | -399.5741  | 15.1298   | 1.5130            |
| G solv           | -737.4599  | 14.1800   | 1.4180            |
| TOTAL            | -1137.0340 | 6.5020    | 0.6502            |

Differences (Complex - Receptor - Ligand):

| Energy Component | Average   | Std. Dev. | Std. Err. of Mean |
|------------------|-----------|-----------|-------------------|
| VDWAALS          | -48.7277  | 5.2304    | 0.5230            |
| EEL              | -174.7994 | 30.3503   | 3.0350            |
| EGB              | 165.8585  | 26.5058   | 2.6506            |
| ESURF            | -8.7804   | 0.4273    | 0.0427            |
| DELTA G gas      | -223.5272 | 28.9961   | 2.8996            |
| DELTA G solv     | 157.0781  | 26.4885   | 2.6488            |
| DELTA TOTAL      | -66.4491  | 6.2731    | 0.6273            |

### Peptide 2 igb-5

GENERALIZED BORN:

Complex:

| Energy Component | Average     | Std. Dev. | Std. Err. of Mean |
|------------------|-------------|-----------|-------------------|
| VDWAALS          | -2365.5123  | 25.4982   | 3.6060            |
| EEL              | -19366.8335 | 95.0269   | 13.4388           |
| EGB              | -3222.6742  | 70.3028   | 9.9423            |
| ESURF            | 85.1095     | 1.7376    | 0.2457            |
| G gas            | -21732.3459 | 100.9640  | 14.2785           |
| G solv           | -3137.5646  | 68.8979   | 9.7436            |

|       |             |         |        |
|-------|-------------|---------|--------|
| TOTAL | -24869.9105 | 52.4306 | 7.4148 |
|-------|-------------|---------|--------|

Receptor:

| Energy Component | Average     | Std. Dev. | Std. Err. of Mean |
|------------------|-------------|-----------|-------------------|
| VDWAALS          | -2299.8150  | 25.3446   | 3.5843            |
| EEL              | -18851.7139 | 96.2538   | 13.6123           |
| EGB              | -2872.5120  | 72.1410   | 10.2023           |
| ESURF            | 85.7902     | 1.7268    | 0.2442            |
| G gas            | -21151.5288 | 104.0846  | 14.7198           |
| G solv           | -2786.7218  | 70.7779   | 10.0095           |
| TOTAL            | -23938.2507 | 51.9886   | 7.3523            |

Ligand:

| Energy Component | Average   | Std. Dev. | Std. Err. of Mean |
|------------------|-----------|-----------|-------------------|
| VDWAALS          | -26.3514  | 2.3454    | 0.3317            |
| EEL              | -305.9267 | 8.8842    | 1.2564            |
| EGB              | -545.2512 | 6.8221    | 0.9648            |
| ESURF            | 7.0009    | 0.0972    | 0.0137            |
| G gas            | -332.2781 | 8.8757    | 1.2552            |
| G solv           | -538.2503 | 6.8478    | 0.9684            |
| TOTAL            | -870.5284 | 6.4386    | 0.9106            |

Differences (Complex - Receptor - Ligand):

| Energy Component | Average   | Std. Dev. | Std. Err. of Mean |
|------------------|-----------|-----------|-------------------|
| VDWAALS          | -39.3459  | 4.7580    | 0.6729            |
| EEL              | -209.1930 | 22.8592   | 3.2328            |
| EGB              | 195.0891  | 20.6437   | 2.9195            |
| ESURF            | -7.6816   | 0.2110    | 0.0298            |
| DELTA G gas      | -248.5389 | 22.6256   | 3.1997            |
| DELTA G solv     | 187.4075  | 20.5996   | 2.9132            |
| DELTA TOTAL      | -61.1314  | 5.6049    | 0.7927            |

**Peptide 3 igb-5**

GENERALIZED BORN:

Complex:

| Energy Component | Average     | Std. Dev. | Std. Err. of Mean |
|------------------|-------------|-----------|-------------------|
| VDWAALS          | -2363.2456  | 20.6895   | 2.9259            |
| EEL              | -19401.1634 | 78.5018   | 11.1018           |
| EGB              | -3261.8151  | 55.0917   | 7.7911            |
| ESURF            | 86.8489     | 1.6805    | 0.2377            |
| G gas            | -21764.4090 | 78.9327   | 11.1628           |
| G solv           | -3174.9662  | 54.3932   | 7.6924            |
| TOTAL            | -24939.3752 | 59.3700   | 8.3962            |

Receptor:

| Energy Component | Average     | Std. Dev. | Std. Err. of Mean |
|------------------|-------------|-----------|-------------------|
| VDWAALS          | -2297.0611  | 20.1991   | 2.8566            |
| EEL              | -18885.7205 | 83.2161   | 11.7685           |
| EGB              | -2906.9922  | 61.5992   | 8.7114            |
| ESURF            | 87.6989     | 1.6535    | 0.2338            |
| G gas            | -21182.7816 | 83.9579   | 11.8734           |
| G solv           | -2819.2933  | 60.8461   | 8.6049            |
| TOTAL            | -24002.0749 | 59.1244   | 8.3615            |

Ligand:

| Energy Component | Average   | Std. Dev. | Std. Err. of Mean |
|------------------|-----------|-----------|-------------------|
| VDWAALS          | -26.9922  | 2.3282    | 0.3293            |
| EEL              | -314.4086 | 10.1483   | 1.4352            |
| EGB              | -538.4494 | 7.1837    | 1.0159            |
| ESURF            | 6.9554    | 0.1021    | 0.0144            |
| G gas            | -341.4009 | 9.8030    | 1.3864            |
| G solv           | -531.4939 | 7.1694    | 1.0139            |
| TOTAL            | -872.8948 | 4.9088    | 0.6942            |

## Differences (Complex - Receptor - Ligand):

| Energy Component | Average   | Std. Dev. | Std. Err. of Mean |
|------------------|-----------|-----------|-------------------|
| VDWAALS          | -39.1923  | 4.6300    | 0.6548            |
| EEL              | -201.0342 | 20.8491   | 2.9485            |
| EGB              | 183.6265  | 20.0581   | 2.8366            |
| ESURF            | -7.8054   | 0.2094    | 0.0296            |
| DELTA G gas      | -240.2266 | 20.9836   | 2.9675            |
| DELTA G solv     | 175.8210  | 20.0662   | 2.8378            |
| DELTA TOTAL      | -64.4055  | 5.3636    | 0.7585            |

**Peptide 4 igb-5**

## GENERALIZED BORN:

## Complex:

| Energy Component | Average     | Std. Dev. | Std. Err. of Mean |
|------------------|-------------|-----------|-------------------|
| VDWAALS          | -2378.5549  | 20.7896   | 2.0790            |
| EEL              | -19339.8113 | 97.1504   | 9.7150            |
| EGB              | -3400.2558  | 69.1389   | 6.9139            |
| ESURF            | 84.3201     | 1.6615    | 0.1662            |
| G gas            | -21718.3662 | 98.2870   | 9.8287            |
| G solv           | -3315.9357  | 68.2142   | 6.8214            |
| TOTAL            | -25034.3019 | 58.1654   | 5.8165            |

## Receptor:

| Energy Component | Average     | Std. Dev. | Std. Err. of Mean |
|------------------|-------------|-----------|-------------------|
| VDWAALS          | -2308.4386  | 20.9152   | 2.0915            |
| EEL              | -18938.8381 | 78.2528   | 7.8253            |
| EGB              | -2857.2877  | 55.6432   | 5.5643            |
| ESURF            | 85.3106     | 1.5559    | 0.1556            |
| G gas            | -21247.2767 | 80.2170   | 8.0217            |
| G solv           | -2771.9771  | 54.8639   | 5.4864            |
| TOTAL            | -24019.2539 | 56.1570   | 5.6157            |

Ligand:

| Energy Component | Average   | Std. Dev. | Std. Err. of Mean |
|------------------|-----------|-----------|-------------------|
| VDWAALS          | -24.6937  | 2.8847    | 0.2885            |
| EEL              | -158.2946 | 16.4590   | 1.6459            |
| EGB              | -768.2275 | 13.7867   | 1.3787            |
| ESURF            | 7.6617    | 0.1795    | 0.0179            |
| G gas            | -182.9883 | 17.4301   | 1.7430            |
| G solv           | -760.5659 | 13.8159   | 1.3816            |
| TOTAL            | -943.5542 | 6.1758    | 0.6176            |

Differences (Complex - Receptor - Ligand):

| Energy Component | Average   | Std. Dev. | Std. Err. of Mean |
|------------------|-----------|-----------|-------------------|
| VDWAALS          | -45.4226  | 5.0439    | 0.5044            |
| EEL              | -242.6786 | 45.5502   | 4.5550            |
| EGB              | 225.2595  | 40.6741   | 4.0674            |
| ESURF            | -8.6522   | 0.5012    | 0.0501            |
| DELTA G gas      | -288.1012 | 45.8605   | 4.5861            |
| DELTA G solv     | 216.6073  | 40.4285   | 4.0429            |
| DELTA TOTAL      | -71.4939  | 8.8496    | 0.8850            |

### Peptide 5 igb-5

GENERALIZED BORN:

Complex:

| Energy Component | Average     | Std. Dev. | Std. Err. of Mean |
|------------------|-------------|-----------|-------------------|
| VDWAALS          | -2419.4652  | 18.4236   | 2.6055            |
| EEL              | -20041.0592 | 96.3658   | 13.6282           |
| EGB              | -3113.1780  | 60.5239   | 8.5594            |
| ESURF            | 89.9446     | 1.4362    | 0.2031            |
| G gas            | -22460.5244 | 94.4350   | 13.3551           |
| G solv           | -3023.2335  | 59.7646   | 8.4520            |
| TOTAL            | -25483.7579 | 50.3830   | 7.1252            |

Receptor:

| Energy Component | Average     | Std. Dev. | Std. Err. of Mean |
|------------------|-------------|-----------|-------------------|
| VDWAALS          | -2332.6030  | 18.5759   | 2.6270            |
| EEL              | -19413.6987 | 98.4606   | 13.9244           |
| EGB              | -2913.1980  | 65.5967   | 9.2768            |
| ESURF            | 91.4357     | 1.5855    | 0.2242            |
| G gas            | -21746.3018 | 99.0142   | 14.0027           |
| G solv           | -2821.7623  | 64.6168   | 9.1382            |
| TOTAL            | -24568.0641 | 52.0092   | 7.3552            |

Ligand:

| Energy Component | Average   | Std. Dev. | Std. Err. of Mean |
|------------------|-----------|-----------|-------------------|
| VDWAALS          | -32.2077  | 2.1156    | 0.2992            |
| EEL              | -442.1916 | 5.9706    | 0.8444            |
| EGB              | -397.5752 | 5.3047    | 0.7502            |
| ESURF            | 7.3331    | 0.1059    | 0.0150            |
| G gas            | -474.3994 | 6.5059    | 0.9201            |
| G solv           | -390.2421 | 5.3260    | 0.7532            |
| TOTAL            | -864.6415 | 4.6020    | 0.6508            |

Differences (Complex - Receptor - Ligand):

| Energy Component | Average   | Std. Dev. | Std. Err. of Mean |
|------------------|-----------|-----------|-------------------|
| VDWAALS          | -54.6545  | 5.6027    | 0.7923            |
| EEL              | -185.1688 | 20.4409   | 2.8908            |
| EGB              | 197.5952  | 16.3736   | 2.3156            |
| ESURF            | -8.8242   | 0.3489    | 0.0493            |
| DELTA G gas      | -239.8233 | 19.6579   | 2.7800            |
| DELTA G solv     | 188.7710  | 16.2888   | 2.3036            |
| DELTA TOTAL      | -51.0524  | 6.5209    | 0.9222            |

**Peptide 6 igb-5**

GENERALIZED BORN:

Complex:

| Energy Component | Average     | Std. Dev. | Std. Err. of Mean |
|------------------|-------------|-----------|-------------------|
| VDWAALS          | -2413.6468  | 23.1955   | 3.2480            |
| EEL              | -19978.9178 | 60.0506   | 8.4088            |
| EGB              | -3021.2282  | 58.6880   | 8.2180            |
| ESURF            | 91.5505     | 1.5972    | 0.2237            |
| G gas            | -22392.5647 | 63.7437   | 8.9259            |
| G solv           | -2929.6777  | 58.2244   | 8.1530            |
| TOTAL            | -25322.2423 | 46.0277   | 6.4452            |

Receptor:

| Energy Component | Average     | Std. Dev. | Std. Err. of Mean |
|------------------|-------------|-----------|-------------------|
| VDWAALS          | -2322.5753  | 23.1036   | 3.2352            |
| EEL              | -19406.7270 | 72.0863   | 10.0941           |
| EGB              | -2865.3578  | 67.9339   | 9.5127            |
| ESURF            | 92.2786     | 1.6104    | 0.2255            |
| G gas            | -21729.3022 | 74.2512   | 10.3972           |
| G solv           | -2773.0792  | 67.5278   | 9.4558            |
| TOTAL            | -24502.3814 | 46.7162   | 6.5416            |

Ligand:

| Energy Component | Average   | Std. Dev. | Std. Err. of Mean |
|------------------|-----------|-----------|-------------------|
| VDWAALS          | -38.2285  | 3.3306    | 0.4664            |
| EEL              | -420.1897 | 27.9186   | 3.9094            |
| EGB              | -325.1664 | 24.6367   | 3.4498            |
| ESURF            | 7.7915    | 0.2669    | 0.0374            |
| G gas            | -458.4181 | 28.0128   | 3.9226            |
| G solv           | -317.3749 | 24.4618   | 3.4253            |
| TOTAL            | -775.7931 | 5.8969    | 0.8257            |

## Differences (Complex - Receptor - Ligand):

| Energy Component | Average   | Std. Dev. | Std. Err. of Mean |
|------------------|-----------|-----------|-------------------|
| VDWAALS          | -52.8431  | 3.7932    | 0.5312            |
| EEL              | -152.0012 | 22.1725   | 3.1048            |
| EGB              | 169.2960  | 18.7154   | 2.6207            |
| ESURF            | -8.5196   | 0.4002    | 0.0560            |
| DELTA G gas      | -204.8443 | 23.3209   | 3.2656            |
| DELTA G solv     | 160.7764  | 18.5583   | 2.5987            |
| DELTA TOTAL      | -44.0679  | 7.5771    | 1.0610            |

**Peptide 7 igb-5**

## GENERALIZED BORN:

## Complex:

| Energy Component | Average     | Std. Dev. | Std. Err. of Mean |
|------------------|-------------|-----------|-------------------|
| VDWAALS          | -2373.3782  | 16.5330   | 2.3381            |
| EEL              | -19562.3052 | 72.7860   | 10.2935           |
| EGB              | -2997.0937  | 49.5179   | 7.0029            |
| ESURF            | 83.9177     | 1.6415    | 0.2321            |
| G gas            | -21935.6834 | 75.2708   | 10.6449           |
| G solv           | -2913.1761  | 48.6466   | 6.8797            |
| TOTAL            | -24848.8595 | 44.9353   | 6.3548            |

## Receptor:

| Energy Component | Average     | Std. Dev. | Std. Err. of Mean |
|------------------|-------------|-----------|-------------------|
| VDWAALS          | -2306.6137  | 18.0609   | 2.5542            |
| EEL              | -18906.1957 | 75.9149   | 10.7360           |
| EGB              | -2836.7560  | 51.0321   | 7.2170            |
| ESURF            | 85.1688     | 1.6978    | 0.2401            |
| G gas            | -21212.8095 | 77.0334   | 10.8942           |
| G solv           | -2751.5872  | 50.2576   | 7.1075            |
| TOTAL            | -23964.3967 | 44.6311   | 6.3118            |



Ligand:

| Energy Component | Average   | Std. Dev. | Std. Err. of Mean |
|------------------|-----------|-----------|-------------------|
| VDWAALS          | -29.0495  | 2.3147    | 0.3273            |
| EEL              | -431.8080 | 8.8445    | 1.2508            |
| EGB              | -367.7632 | 4.8998    | 0.6929            |
| ESURF            | 6.5553    | 0.0997    | 0.0141            |
| G gas            | -460.8575 | 8.2551    | 1.1675            |
| G solv           | -361.2079 | 4.8920    | 0.6918            |
| TOTAL            | -822.0654 | 5.8503    | 0.8274            |

Differences (Complex - Receptor - Ligand):

| Energy Component | Average   | Std. Dev. | Std. Err. of Mean |
|------------------|-----------|-----------|-------------------|
| VDWAALS          | -37.7150  | 4.2461    | 0.6005            |
| EEL              | -224.3015 | 18.9697   | 2.6827            |
| EGB              | 207.4256  | 16.8716   | 2.3860            |
| ESURF            | -7.8064   | 0.1852    | 0.0262            |
| DELTA G gas      | -262.0165 | 18.6553   | 2.6383            |
| DELTA G solv     | 199.6191  | 16.8605   | 2.3844            |
| DELTA TOTAL      | -62.3973  | 5.6928    | 0.8051            |

### Peptide 8 igb-5

GENERALIZED BORN:

Complex:

| Energy Component | Average     | Std. Dev. | Std. Err. of Mean |
|------------------|-------------|-----------|-------------------|
| VDWAALS          | -2364.6323  | 21.7895   | 3.0815            |
| EEL              | -19438.7549 | 82.6823   | 11.6930           |
| EGB              | -2965.1546  | 53.8186   | 7.6111            |
| ESURF            | 85.4195     | 1.4982    | 0.2119            |
| G gas            | -21803.3872 | 81.2950   | 11.4969           |
| G solv           | -2879.7351  | 53.2301   | 7.5279            |

|       |             |         |        |
|-------|-------------|---------|--------|
| TOTAL | -24683.1223 | 49.3948 | 6.9855 |
|-------|-------------|---------|--------|

Receptor:

| Energy Component | Average     | Std. Dev. | Std. Err. of Mean |
|------------------|-------------|-----------|-------------------|
| VDWAALS          | -2296.0542  | 20.4278   | 2.8889            |
| EEL              | -18819.2632 | 77.6933   | 10.9875           |
| EGB              | -2916.1518  | 51.2393   | 7.2463            |
| ESURF            | 86.3401     | 1.2951    | 0.1832            |
| G gas            | -21115.3174 | 76.4907   | 10.8174           |
| G solv           | -2829.8117  | 50.7752   | 7.1807            |
| TOTAL            | -23945.1291 | 47.5595   | 6.7259            |

Ligand:

| Energy Component | Average   | Std. Dev. | Std. Err. of Mean |
|------------------|-----------|-----------|-------------------|
| VDWAALS          | -27.9791  | 2.5583    | 0.3618            |
| EEL              | -433.7503 | 9.3564    | 1.3232            |
| EGB              | -225.6354 | 5.9577    | 0.8425            |
| ESURF            | 6.7511    | 0.0946    | 0.0134            |
| G gas            | -461.7294 | 8.6582    | 1.2245            |
| G solv           | -218.8844 | 5.9084    | 0.8356            |
| TOTAL            | -680.6138 | 5.1290    | 0.7254            |

Differences (Complex - Receptor - Ligand):

| Energy Component | Average   | Std. Dev. | Std. Err. of Mean |
|------------------|-----------|-----------|-------------------|
| VDWAALS          | -40.5990  | 4.2385    | 0.5994            |
| EEL              | -185.7414 | 20.5281   | 2.9031            |
| EGB              | 176.6326  | 14.2019   | 2.0085            |
| ESURF            | -7.6716   | 0.3352    | 0.0474            |
| DELTA G gas      | -226.3404 | 19.3254   | 2.7330            |
| DELTA G solv     | 168.9610  | 14.0647   | 1.9890            |
| DELTA TOTAL      | -57.3794  | 7.5969    | 1.0744            |

results of p62 peptide

Keapl

|               | van der Waals |           |           |           | Electrostatic |           |           |           | Polar Solvation |           |           |           | Non-Polar Solv. |           |           |           | TOTAL                      |  |
|---------------|---------------|-----------|-----------|-----------|---------------|-----------|-----------|-----------|-----------------|-----------|-----------|-----------|-----------------|-----------|-----------|-----------|----------------------------|--|
|               | Avg.          | Std. Dev. | Std. Err. | Std. Err. | Avg.          | Std. Dev. | Std. Err. | Std. Err. | Avg.            | Std. Dev. | Std. Err. | Std. Err. | Avg.            | Std. Dev. | Std. Err. | Std. Err. | of Mean                    |  |
| <b>Tyr334</b> | -2.65058      | 0.280258  | 0.008863  |           | -0.94057      | 0.951044  | 0.030075  |           | 1.510675        | 0.924913  | 0.029248  |           | -0.17905        | 0.032329  | 0.001022  |           | -2.25953 0.330992 0.010467 |  |
| <b>Ser363</b> | 0.649794      | 0.776431  | 0.024553  |           | -11.3075      | 1.402307  | 0.044345  |           | 8.833485        | 0.923345  | 0.029199  |           | -0.0865         | 0.009468  | 0.000299  |           | -1.91072 0.520511 0.01646  |  |
| <b>Arg380</b> | 0.353109      | 1.041189  | 0.032925  |           | -103.525      | 3.933393  | 0.124385  |           | 98.13044        | 2.586803  | 0.081802  |           | -0.35508        | 0.041128  | 0.001301  |           | -5.39702 1.515585 0.047927 |  |
| <b>Asn382</b> | -0.43361      | 0.692361  | 0.021894  |           | -13.4133      | 2.368797  | 0.074908  |           | 9.310144        | 1.286696  | 0.040689  |           | -0.13811        | 0.040496  | 0.001281  |           | -4.67483 1.43588 0.045406  |  |
| <b>Arg415</b> | -1.37147      | 0.716226  | 0.022649  |           | -76.6484      | 5.939867  | 0.187835  |           | 76.94577        | 4.675546  | 0.147854  |           | -0.45368        | 0.059617  | 0.001885  |           | -1.52778 1.82005 0.057555  |  |
| <b>Arg483</b> | -0.45577      | 0.220326  | 0.006967  |           | -44.0776      | 3.822158  | 0.120867  |           | 44.64422        | 3.907286  | 0.123559  |           | -0.12699        | 0.071678  | 0.002267  |           | -0.01617 0.333723 0.010553 |  |
| <b>Ser508</b> | -0.68112      | 0.213004  | 0.006736  |           | -1.29826      | 1.00484   | 0.031776  |           | 1.591844        | 1.191633  | 0.037683  |           | -0.03083        | 0.012624  | 0.000399  |           | -0.41837 0.452926 0.014323 |  |
| <b>Gly509</b> | -0.60992      | 0.164503  | 0.005202  |           | -0.35605      | 0.501837  | 0.015869  |           | 0.486334        | 0.467403  | 0.014781  |           | -0.01163        | 0.013728  | 0.000434  |           | -0.49126 0.252277 0.007978 |  |
| <b>Tyr525</b> | -2.68036      | 0.33577   | 0.010618  |           | 0.353259      | 0.363219  | 0.011486  |           | -0.02325        | 0.443772  | 0.014033  |           | -0.28445        | 0.040504  | 0.001281  |           | -2.63481 0.409334 0.012944 |  |
| <b>Gln530</b> | -0.37133      | 0.530156  | 0.016765  |           | -7.99996      | 0.673199  | 0.021288  |           | 6.665035        | 0.454279  | 0.014366  |           | -0.09515        | 0.020427  | 0.000646  |           | -1.80139 0.46531 0.014714  |  |
| <b>Ser555</b> | -0.94944      | 0.709786  | 0.022445  |           | -3.63758      | 3.466157  | 0.10961   |           | 3.418941        | 3.341223  | 0.105659  |           | -0.07433        | 0.013651  | 0.000432  |           | -1.24241 0.739379 0.023381 |  |
| <b>Ala556</b> | -0.92107      | 0.285512  | 0.009029  |           | 0.384824      | 0.524893  | 0.016599  |           | -0.20717        | 0.508568  | 0.016082  |           | -0.1285         | 0.023756  | 0.000751  |           | -0.87192 0.308143 0.009744 |  |
| <b>Tyr572</b> | -4.09445      | 0.424951  | 0.013438  |           | -0.27906      | 0.643104  | 0.020337  |           | 0.48624         | 0.709168  | 0.022426  |           | -0.40197        | 0.039675  | 0.001255  |           | -4.28923 0.462366 0.014621 |  |
| <b>Phe577</b> | -1.01681      | 0.273473  | 0.008648  |           | -2.3989       | 0.260949  | 0.008252  |           | 2.274724        | 0.227469  | 0.007193  |           | -0.13681        | 0.028311  | 0.000895  |           | -1.27781 0.270809 0.008564 |  |
| <b>Ser602</b> | -0.28284      | 0.493612  | 0.015609  |           | -4.4404       | 1.052518  | 0.033284  |           | 4.955878        | 0.913365  | 0.028883  |           | -0.11057        | 0.015589  | 0.000493  |           | 0.122064 0.391706 0.012387 |  |

p62 peptide

|        | van der Waals |           |           |           | Electrostatic |           |           |           | Polar Solvation |           |           |           | Non-Polar Solv. |           |           |           | TOTAL                      |  |
|--------|---------------|-----------|-----------|-----------|---------------|-----------|-----------|-----------|-----------------|-----------|-----------|-----------|-----------------|-----------|-----------|-----------|----------------------------|--|
|        | Avg.          | Std. Dev. | Std. Err. | Std. Err. | Avg.          | Std. Dev. | Std. Err. | Std. Err. | Avg.            | Std. Dev. | Std. Err. | Std. Err. | Avg.            | Std. Dev. | Std. Err. | Std. Err. | of Mean                    |  |
| Val348 | -0.94706      | 0.233214  | 0.007375  |           | 1.788465      | 0.469953  | 0.014861  |           | -1.31211        | 0.484323  | 0.015316  |           | -0.13213        | 0.056721  | 0.001794  |           | -0.60284 0.359786 0.011377 |  |
| Asp349 | -1.52502      | 0.426956  | 0.013502  |           | -13.9999      | 6.477325  | 0.204831  |           | 15.71222        | 5.793069  | 0.183193  |           | -0.16115        | 0.063019  | 0.001993  |           | 0.02612 1.445804 0.04572   |  |
| Pro350 | -3.26167      | 0.68117   | 0.02154   |           | -1.7535       | 1.02766   | 0.032497  |           | 1.966444        | 0.764361  | 0.024171  |           | -0.69581        | 0.050967  | 0.001612  |           | -3.74454 0.698248 0.022081 |  |
| Sep351 | -4.42535      | 0.863501  | 0.027306  |           | -7.64366      | 2.413237  | 0.076313  |           | 7.054475        | 1.427245  | 0.045133  |           | -0.73804        | 0.029227  | 0.000924  |           | -5.75258 1.668907 0.052775 |  |
| Thr352 | -4.17615      | 0.68668   | 0.021715  |           | -2.6872       | 1.809814  | 0.057231  |           | 3.569311        | 1.953447  | 0.061773  |           | -0.68133        | 0.039797  | 0.001258  |           | -3.97537 0.83241 0.026323  |  |
| Gly353 | -2.52571      | 0.338459  | 0.010703  |           | -0.42207      | 0.583747  | 0.01846   |           | 1.730788        | 0.753551  | 0.023829  |           | -0.36233        | 0.025194  | 0.000797  |           | -1.57932 0.491978 0.015558 |  |
| Glu354 | -2.98516      | 1.187353  | 0.037547  |           | -36.0111      | 4.255578  | 0.134573  |           | 39.35636        | 3.52245   | 0.11139   |           | -0.83134        | 0.028411  | 0.000898  |           | -0.4712 1.547749 0.048944  |  |
| Leu355 | -0.59535      | 0.835368  | 0.026417  |           | -26.6378      | 4.925408  | 0.155755  |           | 24.70902        | 4.45759   | 0.140961  |           | -0.35044        | 0.068272  | 0.002159  |           | -2.87454 1.337757 0.042304 |  |

results of phosphorylated p62 peptide

Keap1

|               | van der Waals |           |           | Electrostatic |           |           | Polar Solvation |           |           | Non-Polar Solv. |           |           | TOTAL    |          |          |
|---------------|---------------|-----------|-----------|---------------|-----------|-----------|-----------------|-----------|-----------|-----------------|-----------|-----------|----------|----------|----------|
|               | Avg.          | Std. Dev. | Std. Err. | Avg.          | Std. Dev. | Std. Err. | Avg.            | Std. Dev. | Std. Err. | Avg.            | Std. Dev. | Std. Err. | of Mean  |          |          |
| <b>Tyr334</b> | -3.27298      | 0.42249   | 0.01336   | -1.80152      | 1.154713  | 0.036515  | 2.003712        | 1.111736  | 0.035156  | -0.33199        | 0.036321  | 0.001149  | -3.40277 | 0.571062 | 0.018059 |
| <b>Ser363</b> | 0.425135      | 0.943537  | 0.029837  | -10.7273      | 5.019354  | 0.158726  | 9.121015        | 3.284334  | 0.10386   | -0.08802        | 0.017825  | 0.000564  | -1.26921 | 1.196768 | 0.037845 |
| <b>Arg380</b> | -0.20596      | 0.585983  | 0.01853   | -109.65       | 3.685418  | 0.116543  | 105.3911        | 3.183255  | 0.100663  | -0.11531        | 0.045414  | 0.001436  | -4.58031 | 0.792467 | 0.02506  |
| <b>Asn382</b> | -0.94287      | 0.548595  | 0.017348  | -9.47946      | 2.555914  | 0.080825  | 7.048486        | 1.458144  | 0.046111  | -0.18947        | 0.032258  | 0.00102   | -3.56332 | 1.531424 | 0.048428 |
| <b>Arg415</b> | -1.44914      | 0.960874  | 0.030386  | -146.744      | 9.693614  | 0.306539  | 136.1236        | 7.126017  | 0.225344  | -0.67484        | 0.090783  | 0.002871  | -12.7441 | 3.239217 | 0.102433 |
| <b>Arg483</b> | 0.366532      | 0.876819  | 0.027727  | -121.026      | 3.623173  | 0.114575  | 107.2378        | 2.55411   | 0.080768  | -0.13002        | 0.035895  | 0.001135  | -13.5512 | 1.349629 | 0.042679 |
| <b>Ser508</b> | 0.740992      | 0.864295  | 0.027331  | -15.3957      | 2.451926  | 0.077537  | 10.38405        | 1.837035  | 0.058092  | -0.06777        | 0.024046  | 0.00076   | -4.33848 | 1.01958  | 0.032242 |
| <b>Ser509</b> | -0.29188      | 0.164434  | 0.0052    | 0.155978      | 1.426037  | 0.045095  | 0.245532        | 1.2423    | 0.039285  | -0.03586        | 0.017481  | 0.000553  | 0.073769 | 0.367862 | 0.011633 |
| <b>Tyr525</b> | -2.90513      | 0.404003  | 0.012776  | 1.396184      | 1.164136  | 0.036813  | -0.85738        | 0.970995  | 0.030706  | -0.32787        | 0.034485  | 0.001091  | -2.69419 | 0.54241  | 0.017153 |
| <b>Gln530</b> | -0.47484      | 0.417529  | 0.013203  | -12.2097      | 1.275091  | 0.040322  | 10.06422        | 1.421375  | 0.044948  | -0.07853        | 0.026483  | 0.000837  | -2.69882 | 0.652159 | 0.020623 |
| <b>Ser555</b> | -0.13645      | 0.664052  | 0.020999  | -12.3761      | 2.02267   | 0.063962  | 11.59449        | 1.567941  | 0.049583  | -0.09251        | 0.019956  | 0.000631  | -1.01054 | 0.620053 | 0.019608 |
| <b>Ala556</b> | -0.88698      | 0.186599  | 0.005901  | -2.57115      | 0.813501  | 0.025725  | 2.80465         | 0.784062  | 0.024794  | -0.15701        | 0.021543  | 0.000681  | -0.81049 | 0.21728  | 0.006871 |
| <b>Tyr572</b> | -4.41325      | 0.489677  | 0.015485  | 0.978753      | 0.816302  | 0.025814  | -0.26548        | 0.858765  | 0.027157  | -0.44383        | 0.03835   | 0.001213  | -4.1438  | 0.517318 | 0.016359 |
| <b>Phe577</b> | -1.19196      | 0.238595  | 0.007545  | -2.55334      | 0.348968  | 0.011035  | 2.4883          | 0.308107  | 0.009743  | -0.11558        | 0.028117  | 0.000889  | -1.37257 | 0.24164  | 0.007641 |
| <b>Ser602</b> | -0.29327      | 0.542435  | 0.017153  | -7.93122      | 1.882468  | 0.059529  | 8.091667        | 1.688612  | 0.053399  | -0.1167         | 0.020354  | 0.000644  | -0.24952 | 0.500374 | 0.015823 |

phosphorylated p62 peptide

|        | van der Waals |           |           | Electrostatic |           |           | Polar Solvation |           |           | Non-Polar Solv. |           |           | TOTAL    |          |          |
|--------|---------------|-----------|-----------|---------------|-----------|-----------|-----------------|-----------|-----------|-----------------|-----------|-----------|----------|----------|----------|
|        | Avg.          | Std. Dev. | Std. Err. | Avg.          | Std. Dev. | Std. Err. | Avg.            | Std. Dev. | Std. Err. | Avg.            | Std. Dev. | Std. Err. | of Mean  |          |          |
| Val348 | -0.88901      | 0.190498  | 0.006024  | 0.541256      | 0.28318   | 0.008955  | -0.6346         | 0.327902  | 0.010369  | -0.12353        | 0.04336   | 0.001371  | -1.10589 | 0.282598 | 0.008937 |
| Asp349 | -1.16958      | 0.595048  | 0.018817  | -23.7219      | 6.748379  | 0.213402  | 25.17676        | 5.646622  | 0.178562  | -0.11322        | 0.02977   | 0.000941  | 0.172048 | 1.614726 | 0.051062 |
| Pro350 | -2.79617      | 0.553152  | 0.017492  | -0.67741      | 1.284224  | 0.040611  | 0.862109        | 1.137102  | 0.035958  | -0.5673         | 0.050652  | 0.001602  | -3.17877 | 0.668469 | 0.021139 |
| Sep351 | -3.34182      | 1.601164  | 0.050633  | -84.2029      | 8.59228   | 0.271712  | 107.1729        | 7.394285  | 0.233828  | -1.19669        | 0.050141  | 0.001586  | 18.43145 | 2.773987 | 0.087721 |
| Thr352 | -4.50282      | 0.765324  | 0.024202  | -2.09675      | 1.599919  | 0.050594  | 1.786989        | 1.314057  | 0.041554  | -0.62766        | 0.036851  | 0.001165  | -5.44024 | 0.78789  | 0.024915 |
| Gly353 | -2.5714       | 0.349543  | 0.011054  | -0.13713      | 0.566716  | 0.017921  | 0.846111        | 0.667677  | 0.021114  | -0.33036        | 0.02785   | 0.000881  | -2.19278 | 0.458198 | 0.01449  |
| Glu354 | -3.43288      | 1.061362  | 0.033563  | -44.9448      | 5.746092  | 0.181707  | 48.09714        | 4.268524  | 0.134983  | -0.83332        | 0.051855  | 0.00164   | -1.11389 | 2.053662 | 0.064943 |
| Leu355 | -2.755        | 0.78098   | 0.024697  | -0.74826      | 5.479978  | 0.173292  | 3.01935         | 5.404865  | 0.170917  | -0.55946        | 0.163192  | 0.005161  | -1.04337 | 1.101574 | 0.034835 |

#### Peptide Synthesis and Purification.

All linear peptides were synthesized manually using a standard solid phase peptide synthesis approach with Fmoc chemistry. Peptide couplings were carried out using HATU and DIPEA in DMF. The N-terminal acetyl group was attached using acetic anhydride and DIPEA in DMF. Fmoc removal was achieved with 20% piperidine in DMF for 20 min. Peptides were cleaved from the resin and side chain deprotected using TFA–TIS–H<sub>2</sub>O (95: 2.5: 2.5). All reactions were carried out at room temperature. Cyclization was carried out in solution with 0.1 M ammonium bicarbonate, pH 8.0, for 24 h at a peptide concentration of 0.5 mM. The crude peptide was purified by semi-preparative reverse-phase high performance liquid chromatography (RP-HPLC). The purity and molecular mass of the synthesized and cyclized peptide were confirmed with liquid chromatography-mass spectroscopy (LC-MS).

# P62 peptide

## Analysis Report

Inj. Date: 12/23/2014 15:24:20

Operator: Kai Yuan

Product Name: P105037

Lot: ON121614LJ-02B

Mobile Phase: A: 0.1% TFA in H2O

B: 0.1% TFA in 100% ACN

Grads: 25%-45%B in 20 min Flow : 1.0 ml/min

Column : 4.6×250mm, Welchrom C18

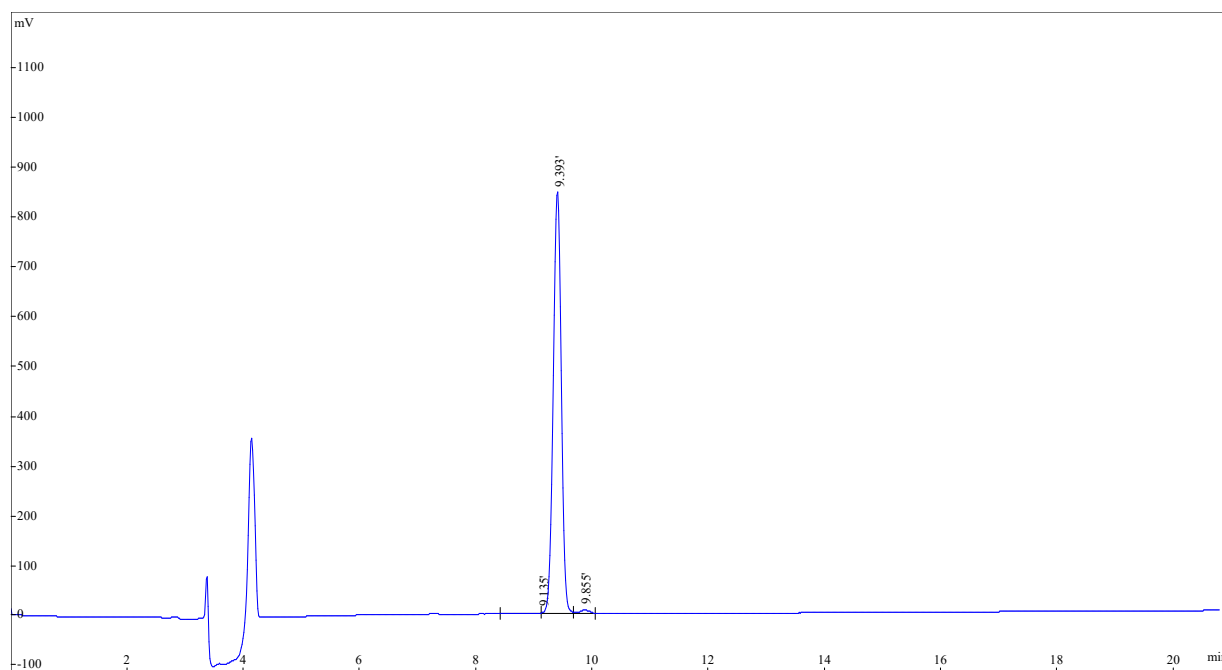

---

| Rank | Time  | Name | Conc.  | Area    |
|------|-------|------|--------|---------|
| 1    | 9.135 |      | 0.2962 | 24643   |
| 2    | 9.393 |      | 98.76  | 8217614 |
| 3    | 9.855 |      | 0.949  | 78964   |

---

|       |  |  |     |         |
|-------|--|--|-----|---------|
| Total |  |  | 100 | 8321221 |
|-------|--|--|-----|---------|

Product Name: P105037

Lot: 0N121614LJ-02B

MW: 858.87

Date: 2014-12-23

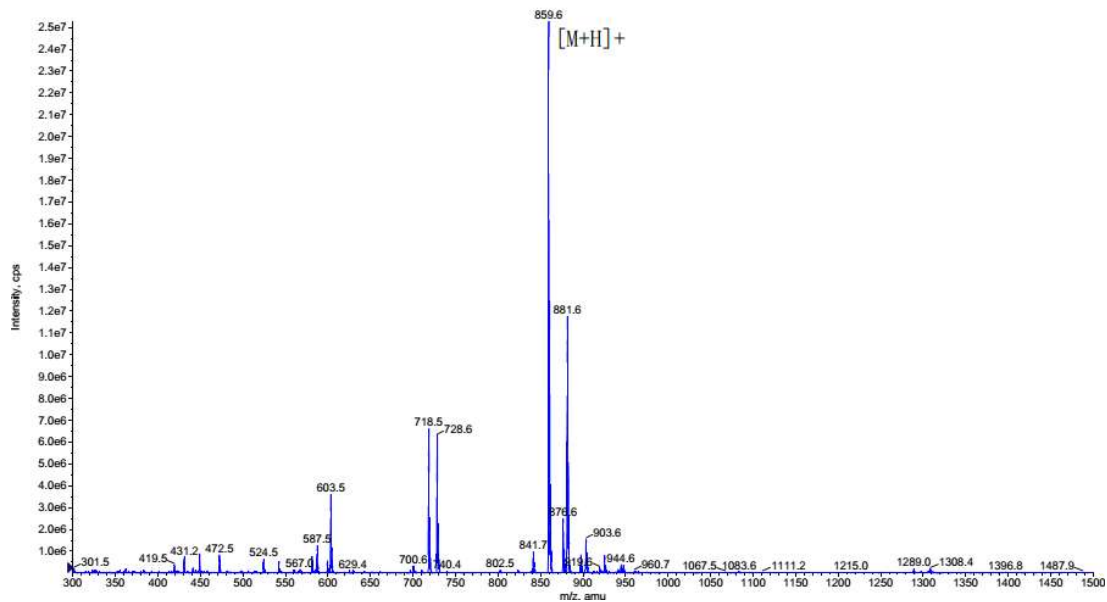

Phosphorylated p62 peptide

## Analysis Report

Inj. Date: 12/23/2014 09:46:09

Operator: Kai Yuan

Product Name: P105038

Lot: ON121614LJ-02C

Mobile Phase: A: 0.1% TFA in H2O

B: 0.1% TFA in 100% ACN

Grads: 16%-36%B in 20 min Flow : 1.0 ml/min

Column : 4.6×250mm, Welchrom C18

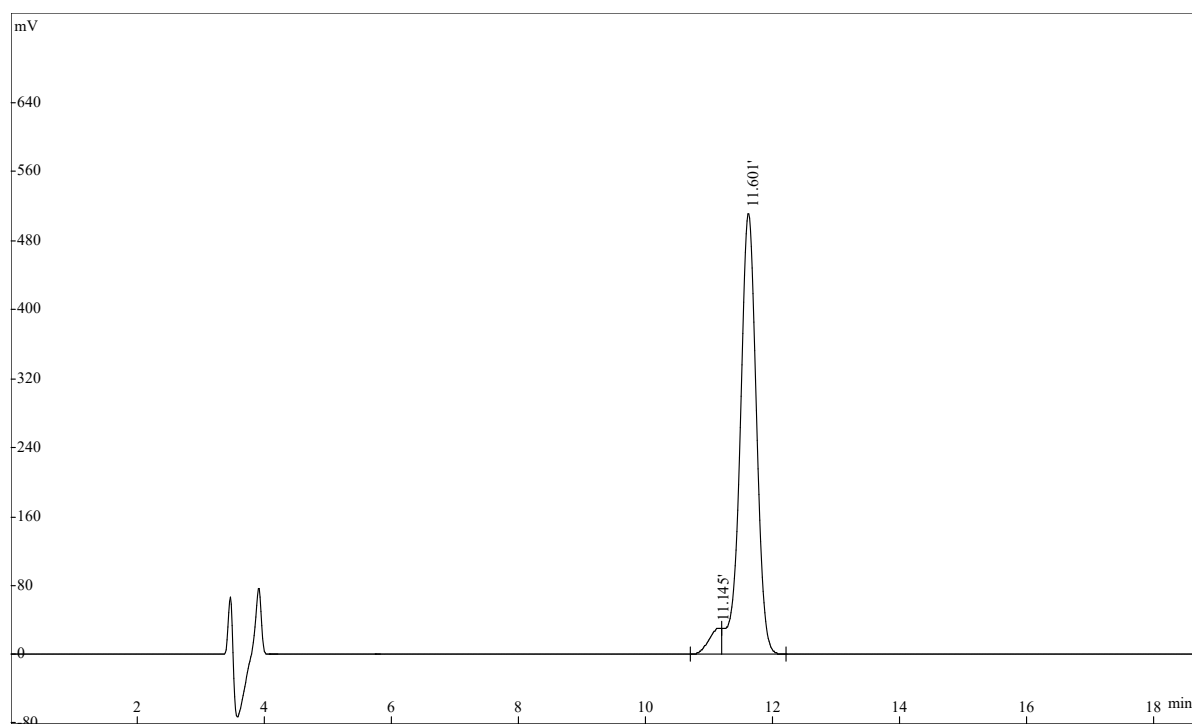

| Time   | Quantity | Area    | Height | Resolut. | T.PlateNum | Asymmetry |
|--------|----------|---------|--------|----------|------------|-----------|
| 11.145 | 4.756    | 454741  | 31378  | 1.06     | 13800      | 1.26      |
| 11.601 | 95.24    | 9106342 | 512779 | 0.00     | 9957       | 0.99      |
|        | 100      | 9561083 | 544157 |          |            |           |



Product Name: P105038

Lot: 0N121614LJ-02C

MW: 938.87

Date: 2014-12-23

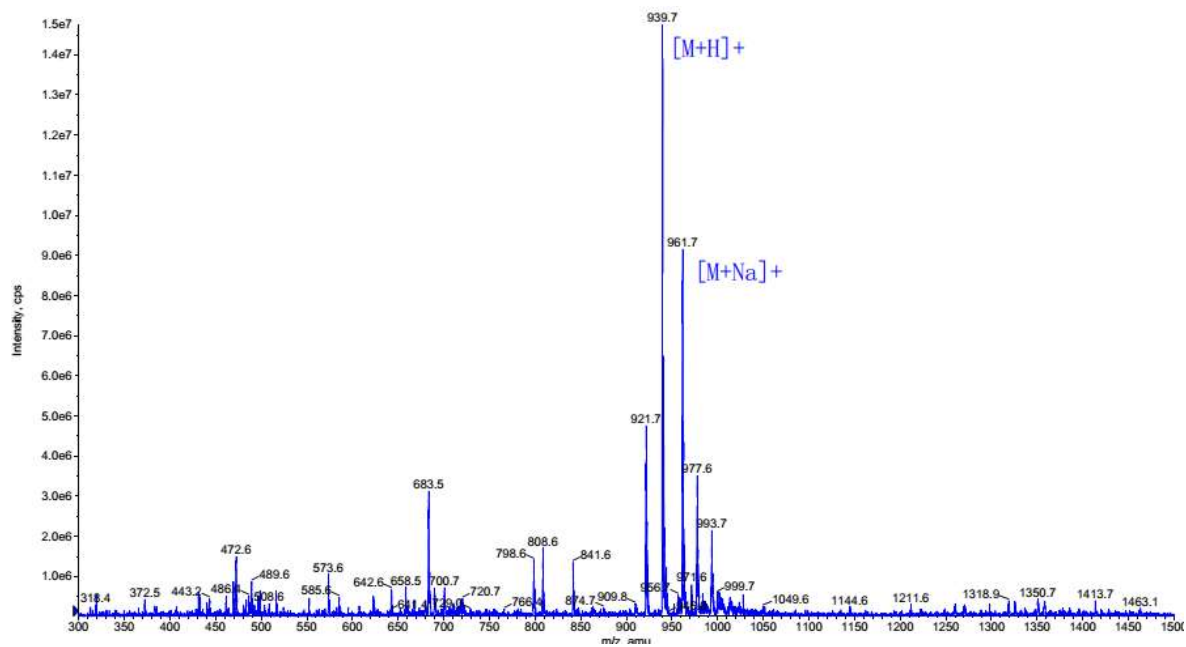

Supplement: c6mb00030d1.pdf [file c6mb00030d1.pdf]
